# Supplementary material for: Immunoexpression of Trefoil Factor 1 in Non-Neoplastic and Neoplastic Canine Gastric Tissues
Source: MDPI journal article supplement (doi:10.3390/ani11102855), 2021-09-29
Supplement: s1 [file s1]

Supplementary Material

# Immunoexpression of Trefoil Factor 1 in Non-Neoplastic and Neoplastic Canine Gastric Tissues

Ana R. Flores <sup>1,2,3</sup>, Marisa Castro <sup>1</sup>, Alexandra Rêma <sup>1</sup>, João R. Mesquita <sup>4</sup>, Marian Taulescu <sup>5,6,\*</sup>, Fátima Gärtner <sup>1,2,7</sup>, Fernanda Seixas <sup>3</sup> and Irina Amorim <sup>1,2,7</sup>

- <sup>1</sup> Department of Pathology and Molecular Immunology of the Institute of Biomedical Sciences Abel Salazar (ICBAS), University of Porto; Rua Jorge Viterbo Ferreira nr. 228, 4050-313 Porto, Portugal; anaruflores@gmail.com (A.R.F.); mmcastro@icbas.up.pt (M.C.); alexandra.rema@gmail.com (A.R.); fgartner@ipatimup.pt (F.G.); iamorim@ipatimup.pt (I.A.)
  - <sup>2</sup> Institute of Pathology and Molecular Immunology of the University of Porto (IPATIMUP); Rua Dr Roberto Frias s/n, 4200-465 Porto, Portugal
  - <sup>3</sup> Animal and Veterinary Research Center (CECAV), Associate laboratory AL4AnimalS, University of Trás-os-Montes e Alto Douro (UTAD), Quinta dos Prados, apartado 1013, 5001-801 Vila Real, Portugal; fseixas@utad.pt
  - <sup>4</sup> Epidemiology Research Unit (EPIUnit), Instituto de Saúde Pública da Universidade do Porto (ISPUP); Rua das Taipas, n.º 135, 4050-600 Porto, Portugal; jmesquita@outlook.com
  - <sup>5</sup> Department of Pathology, Faculty of Veterinary Medicine, University of Agricultural Sciences and Veterinary Medicine, 400372 Cluj-Napoca, Romania
  - <sup>6</sup> Synevo Laboratory, 81 Pache Protopopescu, 021408 Bucharest, Romania
  - <sup>7</sup> i3S-Instituto de Investigação e Inovação em Saúde, Universidade do Porto; Rua Alfredo Allen, 4200-135 Porto, Portugal
- \* Correspondence: marian.taulescu@usamvcluj.ro

**Citation:** Flores, A.R.; Castro, M.; Rêma, A.; Mesquita, J.R.; Taulescu, M.; Gärtner, F.; Seixas, F.; Amorim, I. Immunoexpression of Trefoil-Factor 1 in Non-Neoplastic and Neoplastic Canine Gastric Tissues. *Animals* **2021**, *11*, 2855. <https://doi.org/10.3390/10.3390/ani11102855>

Academic Editor: Emir Hadzijušević

Received: 18 August 2021

Accepted: 26 September 2021

Published: 29 September 2021

**Publisher's Note:** MDPI stays neutral with regard to jurisdictional claims in published maps and institutional affiliations.

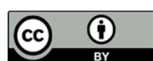

**Copyright:** © 2021 by the authors. Licensee MDPI, Basel, Switzerland. This article is an open access article distributed under the terms and conditions of the Creative Commons Attribution (CC BY) license (<http://creativecommons.org/licenses/by/4.0/>).

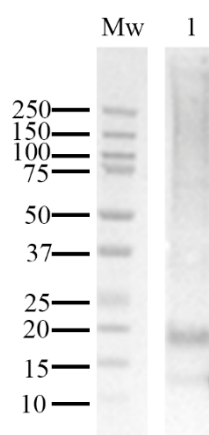

**Figure S1.** Western blot analysis of Anti-estrogen inducible protein pS2 rabbit monoclonal antibody in normal canine gastric mucosa. (1) Normal canine gastric mucosa protein extract. Presence of a dominant band near 15 and 20 kDa.
